# Supplementary material for: The Impact of the COVID-19 Pandemic on Childhood Obesity and Lifestyle—A Report from Italy
Source: Pediatr Rep. 2022 Sep 29;14(4):410–8. doi: 10.3390/pediatric14040049 (PMC9589932; doi:10.3390/pediatric14040049)
Supplement: Supplementary file 1 [file pediatrrep-14-00049-s001.zip › pediatrrep-1906224-supplementary.pdf]

**Table S1.** Comparison of study about children weight and nutritional habits  
(SUPPLEMENTARY MATERIAL)

| Authors,<br>country                  | Sample<br>size         | Age<br>(years) | Impact of<br>lockdown<br>on<br>children's<br>weight                                                               | Impact of lockdown<br>on children's life style<br>and eating habits                                                                                                                                                               |
|--------------------------------------|------------------------|----------------|-------------------------------------------------------------------------------------------------------------------|-----------------------------------------------------------------------------------------------------------------------------------------------------------------------------------------------------------------------------------|
| Pietrobelli<br>et al. [12],<br>Italy | 41<br>participants     | 13.0 ±<br>3.1  | NA                                                                                                                | ↑ meals eaten per day<br>↑ fruit intake<br>↑ potato chip, red<br>meat, and sugary drink<br>intakes<br>↓ time spent in sports<br>activities<br>↑ sleep time<br>↑ screen time                                                       |
| Kim et al.<br>[30], China            | 90<br>participants     | 12.2 ±<br>3.4  | ↑ Body<br>weight Z-<br>score (2.0 ±<br>0.8 vs. 2.2 ±<br>0.7)<br>↑ BMI Z-<br>score (1.9 ±<br>0.5 vs. 2.0 ±<br>0.4) | NA                                                                                                                                                                                                                                |
| Androutsos<br>et al. [27],<br>Greek  | 397<br>participants    | 7.8 ±<br>4.1   | NA                                                                                                                | ↑ sleep time<br>↑ screen time<br>↓ time spent in sports<br>activities<br>↑ fruits and fresh fruit<br>juices, vegetables,<br>dairy products, pasta,<br>sweets, total snacks,<br>and breakfast intake<br>↓ fast food<br>consumption |
| Yang et al.<br>[31], China           | 10 082<br>participants | 19.8 ±<br>2.3  | ↑ BMI (21.8-<br>22.6)<br><br>↑<br>Prevalence<br>of<br>overweight<br>(21.3%-<br>25.1%)                             | ↑ sedentary time<br>↑ sleeping time<br>↑ screen time<br>= physical activity<br>levels                                                                                                                                             |

|                               |                   |                                   |                                                                 |                                                                                                                                                                                                                       |
|-------------------------------|-------------------|-----------------------------------|-----------------------------------------------------------------|-----------------------------------------------------------------------------------------------------------------------------------------------------------------------------------------------------------------------|
| Censi et al. [26], Italy      | 1027 participants | 2-5 years (40%), 6-11 years (60%) | NA                                                              | ↓ time spent in sports activities<br>↓ adherence to Mediterranean diet<br>↑ screen time                                                                                                                               |
| Philippe et al. [29], France  | 498 participants  | 7.3 ± 2.2                         | NA                                                              | = snack frequency<br>↑ candy/chocolate, fruit juices, sodas, chips/ salty biscuits, ice creams, pastries/cake/sweet cookies, cream dessert, milks, yoghurt/cheese/quark, fresh and dried fruits, and nuts<br>↓ fruits |
| Ruiz-Roso et al. [28], Brasil | 820 participants  | 15 mean aged                      | NA                                                              | ↑ Legumes, vegetables, and fruit intakes<br>↓ fast food intake<br>↑ fried and sweet food average intakes<br>= sugar-sweetened beverage intakes                                                                        |
| Woo et al. [32], Korea        | 97 participants   | 11.09 mean aged                   | ↑ BMI (27.3-28.4)<br>↑ Prevalence of severe obesity (23.7%-33%) | ↑ screen time<br>↓ time spent in sports activities                                                                                                                                                                    |

BMI: body mass index; NA: not available
